# Supplementary material for: Physical Activity, Sedentary Behavior and Well-Being of Adults with Physical Disabilities and/or Chronic Diseases during the First Wave of the COVID-19 Pandemic: A Rapid Review
Source: MDPI journal article supplement (doi:10.3390/ijerph18126342), 2021-06-11
Supplement: s1 [file s1]

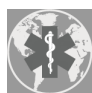

**Table S1.** Physical activity pre and during lockdown.

| Author and Year           | PA type and units of measurement                      | PA Pre-Lockdown Mean (SD) | PA During Lock-down Mean (SD) | Change in PA | P value (if applicable) | Lockdown restrictions                                                                                                                                                                                                                                                                                                                                                                                                                                      |
|---------------------------|-------------------------------------------------------|---------------------------|-------------------------------|--------------|-------------------------|------------------------------------------------------------------------------------------------------------------------------------------------------------------------------------------------------------------------------------------------------------------------------------------------------------------------------------------------------------------------------------------------------------------------------------------------------------|
| Barone et al. (2020) [27] | <i>Change in PA - % participants</i>                  |                           |                               |              |                         |                                                                                                                                                                                                                                                                                                                                                                                                                                                            |
|                           | High increase                                         |                           | 2.29%                         |              |                         |                                                                                                                                                                                                                                                                                                                                                                                                                                                            |
|                           | Low increase                                          | N.A.                      | 4.64%                         | N.A.         | N.A.                    | “Decentralized (defined by states and municipalities) and delayed, the measures to contain the SARS-CoV-2 spread in Brazil, and reflected on mobility reduction, was experienced by 95.1% of this study’s respondents in different degrees (with 26.9% never going outside their homes)”                                                                                                                                                                   |
|                           | No change                                             |                           | 33.57%                        |              |                         |                                                                                                                                                                                                                                                                                                                                                                                                                                                            |
|                           | Low reduction                                         |                           | 14.70%                        |              |                         |                                                                                                                                                                                                                                                                                                                                                                                                                                                            |
|                           | High reduction                                        |                           | 44.8%                         |              |                         |                                                                                                                                                                                                                                                                                                                                                                                                                                                            |
| Khader et al. (2020) [34] | <i>Change in PA - % participants</i>                  |                           |                               |              |                         |                                                                                                                                                                                                                                                                                                                                                                                                                                                            |
|                           | Increased                                             | N.A.                      | 69%                           | N.A.         | N.A.                    | “A series of lockdowns starting from March 24, 2020 were imposed on people in the country to break the chain of virus transmission [4]. Further, United Nations and WHO have praised India’s response to the pandemic as ‘comprehensive’ and ‘robust’. However, since the start of “unlocking” and easing of restrictions from June 1st, India is witnessing an exponential rise in COVID-19 cases indicating the possibility of ‘community transmission’. |
|                           | No change                                             |                           | 25%                           |              |                         |                                                                                                                                                                                                                                                                                                                                                                                                                                                            |
|                           | Decreased                                             |                           | 6%                            |              |                         |                                                                                                                                                                                                                                                                                                                                                                                                                                                            |
|                           |                                                       |                           |                               |              |                         |                                                                                                                                                                                                                                                                                                                                                                                                                                                            |
| Yan et al. (2020) [46]    | <i>Change in PA - % total participants</i>            |                           |                               |              |                         |                                                                                                                                                                                                                                                                                                                                                                                                                                                            |
|                           | Increased a lot                                       |                           | 17.8%                         |              |                         |                                                                                                                                                                                                                                                                                                                                                                                                                                                            |
|                           | Increased a little                                    |                           | 25.0%                         |              |                         |                                                                                                                                                                                                                                                                                                                                                                                                                                                            |
|                           | No change                                             |                           | 24.6%                         |              |                         |                                                                                                                                                                                                                                                                                                                                                                                                                                                            |
|                           | Decreased a little                                    |                           | 17.3%                         |              |                         |                                                                                                                                                                                                                                                                                                                                                                                                                                                            |
|                           | Decreased a lot                                       |                           | 15.2%                         |              |                         |                                                                                                                                                                                                                                                                                                                                                                                                                                                            |
|                           | <i>Change in PA - % participants without diabetes</i> |                           |                               |              |                         |                                                                                                                                                                                                                                                                                                                                                                                                                                                            |
|                           | Increased a lot                                       | N.A.                      | 16.0%                         | N.A.         |                         | “China implemented a lockdown of Wuhan in late January 2020 to contain the spread of COVID-19. China is slowly beginning to reopen since lifting the lockdown in mid-May.”                                                                                                                                                                                                                                                                                 |
|                           | Increased a little                                    |                           | 25.2%                         |              |                         |                                                                                                                                                                                                                                                                                                                                                                                                                                                            |
|                           | No change                                             |                           | 25.0%                         |              |                         |                                                                                                                                                                                                                                                                                                                                                                                                                                                            |
|                           | Decreased a little                                    |                           | 17.9%                         |              |                         |                                                                                                                                                                                                                                                                                                                                                                                                                                                            |
|                           | Decreased a lot                                       |                           | 16.0%                         |              |                         |                                                                                                                                                                                                                                                                                                                                                                                                                                                            |
|                           | <i>Change in PA - % participants with diabetes</i>    |                           |                               |              |                         |                                                                                                                                                                                                                                                                                                                                                                                                                                                            |
|                           | Increased a lot                                       |                           | 44.6%                         |              |                         |                                                                                                                                                                                                                                                                                                                                                                                                                                                            |
|                           |                                                       |                           | 23.1%                         |              |                         |                                                                                                                                                                                                                                                                                                                                                                                                                                                            |
|                           |                                                       |                           | 19.5%                         |              |                         |                                                                                                                                                                                                                                                                                                                                                                                                                                                            |
|                           | Increased a lot                                       |                           | 8.2%                          |              |                         |                                                                                                                                                                                                                                                                                                                                                                                                                                                            |
|                           |                                                       |                           |                               |              |                         |                                                                                                                                                                                                                                                                                                                                                                                                                                                            |
|                           |                                                       |                           |                               |              |                         |                                                                                                                                                                                                                                                                                                                                                                                                                                                            |
|                           |                                                       |                           |                               |              |                         |                                                                                                                                                                                                                                                                                                                                                                                                                                                            |
|                           |                                                       |                           |                               |              |                         |                                                                                                                                                                                                                                                                                                                                                                                                                                                            |

|                                                                |           |        |
|----------------------------------------------------------------|-----------|--------|
| Increased a little                                             | 4.6%      |        |
| No change                                                      |           |        |
| Decreased a little                                             |           | <0.001 |
| Decreased a lot                                                | 1.2 (1.5) |        |
|                                                                | 1.1 (1.4) |        |
| <i>PA - hours per day</i>                                      | 2.0 (2.0) |        |
| Total participants                                             |           |        |
| Participants without diabetes                                  |           | <0.001 |
| Participants with diabetes                                     | 59.2%     |        |
|                                                                | 58.1%     |        |
|                                                                | 73.8%     |        |
| <i>PA 150 minutes per week - % participants</i>                |           |        |
| Total participants                                             |           |        |
| Participants without diabetes                                  | 42.9%     |        |
|                                                                | 9.3%      |        |
| Participants with diabetes                                     | 20.5%     |        |
|                                                                | 14.4%     |        |
|                                                                | 12.9%     |        |
| <i>Frequency of exercise - % participants without diabetes</i> |           |        |
| Never/Rarely                                                   | 46.5%     |        |
| <1 time per week                                               | 8.5%      |        |
| 1-2 time per week                                              | 26.5%     |        |
| 3-5 time per                                                   | 10.3%     |        |
| Daily                                                          | 8.2%      |        |
| <i>Frequency of exercise - % participants with diabetes</i>    |           |        |
| Never/Rarely                                                   | 40.0%     |        |
| <1 time per week                                               | 23.9%     |        |
| 1-2 time per week                                              | 11.8%     |        |
| 3-5 time per                                                   | 31.5%     |        |
| Daily                                                          | 40.6%     |        |
| <i>Type of exercise - % participants without diabetes</i>      | 43.4%     |        |
|                                                                | 47.7%     |        |
| Walking / slow walking                                         | 38.8%     |        |
|                                                                | 23.4%     |        |

|                             |                                                        |              |             |        |        |                                                                                                                                                                                                                                                                                                                                            |
|-----------------------------|--------------------------------------------------------|--------------|-------------|--------|--------|--------------------------------------------------------------------------------------------------------------------------------------------------------------------------------------------------------------------------------------------------------------------------------------------------------------------------------------------|
|                             | Quick walking / square dance                           |              | 25.6%       |        |        |                                                                                                                                                                                                                                                                                                                                            |
|                             | Tai Chi/ Qigong / Ba Duan Jin                          |              |             |        |        |                                                                                                                                                                                                                                                                                                                                            |
|                             | Other indoor exercises                                 |              |             |        |        |                                                                                                                                                                                                                                                                                                                                            |
|                             | No exercise                                            |              |             |        |        |                                                                                                                                                                                                                                                                                                                                            |
|                             | <i>Type of exercise - % participants with diabetes</i> |              |             |        |        |                                                                                                                                                                                                                                                                                                                                            |
|                             | Walking / slow walking                                 |              |             |        |        |                                                                                                                                                                                                                                                                                                                                            |
|                             | Quick walking / square dance                           |              |             |        |        |                                                                                                                                                                                                                                                                                                                                            |
|                             | Tai Chi/ Qigong / Ba Duan Jin                          |              |             |        |        |                                                                                                                                                                                                                                                                                                                                            |
|                             | Other indoor exercises                                 |              |             |        |        |                                                                                                                                                                                                                                                                                                                                            |
|                             | No exercise                                            |              |             |        |        |                                                                                                                                                                                                                                                                                                                                            |
|                             | <i>Minutes of exercise</i>                             | 66 (42)      | 38 (31)     | -28    |        |                                                                                                                                                                                                                                                                                                                                            |
|                             | <i>Number of steps</i>                                 | 12606 (5026) | 4760 (3145) | -7846  |        |                                                                                                                                                                                                                                                                                                                                            |
| Assaloni et al. (2020) [47] | <i>Type of exercise - % participants</i>               | 35.7%        | -           |        | <0.001 | "In accordance to Istituto Superiore della Sanità (ISS), the Italian Government implemented extraordinary measures to limit viral transmission throughout people and the territory, imposed national quarantine, reduced social interaction and travelling and "stay at home" as a basic means of limiting people's exposure to the virus. |
|                             | Individual sport                                       | 4.5%         | -           |        | <0.001 |                                                                                                                                                                                                                                                                                                                                            |
|                             | Team sport                                             | 10.4%        | -           |        |        |                                                                                                                                                                                                                                                                                                                                            |
|                             | Fitness                                                | 3.9%         | -           |        |        |                                                                                                                                                                                                                                                                                                                                            |
|                             | Resistance training                                    | 36.4%        | 82.5%       | +46.1% |        |                                                                                                                                                                                                                                                                                                                                            |
|                             | In autonomy                                            | 9.1%         | 17.5%       | +8.4%  |        |                                                                                                                                                                                                                                                                                                                                            |
|                             | None                                                   |              |             |        |        |                                                                                                                                                                                                                                                                                                                                            |
|                             | <i>Change in type - % participants</i>                 |              | 80.42%      |        |        |                                                                                                                                                                                                                                                                                                                                            |
|                             | Total                                                  |              | 81.32%      |        |        |                                                                                                                                                                                                                                                                                                                                            |
|                             | Male                                                   |              | 78.85%      |        |        |                                                                                                                                                                                                                                                                                                                                            |
|                             | Female                                                 |              |             |        |        |                                                                                                                                                                                                                                                                                                                                            |
| khare et al. (2020) [48]    |                                                        | N.A.         |             | N.A.   | N.A.   | "Temporary lock down of country along with all precautions advised like social distancing and social isolation."                                                                                                                                                                                                                           |
|                             | <i>Change in timing - % participants</i>               |              | 72.72%      |        |        |                                                                                                                                                                                                                                                                                                                                            |
|                             | Total                                                  |              | 73.63%      |        |        |                                                                                                                                                                                                                                                                                                                                            |
|                             | Male                                                   |              | 71.15%      |        |        |                                                                                                                                                                                                                                                                                                                                            |
|                             | Female                                                 |              |             |        |        |                                                                                                                                                                                                                                                                                                                                            |

|                                 |                                                                                                                       |                                        |           |        |         |                                                                                                                                                                                                                                                                   |
|---------------------------------|-----------------------------------------------------------------------------------------------------------------------|----------------------------------------|-----------|--------|---------|-------------------------------------------------------------------------------------------------------------------------------------------------------------------------------------------------------------------------------------------------------------------|
|                                 |                                                                                                                       |                                        | 60.84%    |        |         |                                                                                                                                                                                                                                                                   |
|                                 |                                                                                                                       | Change in duration -<br>% participants | 56.04%    |        |         |                                                                                                                                                                                                                                                                   |
|                                 |                                                                                                                       | Total                                  | 69.23%    |        |         |                                                                                                                                                                                                                                                                   |
|                                 |                                                                                                                       | Male                                   |           |        |         |                                                                                                                                                                                                                                                                   |
|                                 |                                                                                                                       | Female                                 |           |        |         |                                                                                                                                                                                                                                                                   |
| Munekawa et al.<br>(2020) [35]  | Change in exercise -<br>Likert scale (0: consid-<br>erably reduced, 5: no<br>change, 10: considera-<br>bly increased) | N.A.                                   | 3.7 (2.0) | N.A.   | N.A.    | “In Japan, a state of emergency, with request-based measures of encouraging the populace to remain at home and businesses to limit operations, was declared on April 7, 2020. Therefore, the Japanese are also becoming more restric-<br>tive in their behavior.” |
|                                 | Decreased exercise - %<br>participants                                                                                |                                        | 53.96%    |        |         |                                                                                                                                                                                                                                                                   |
|                                 |                                                                                                                       |                                        |           |        |         |                                                                                                                                                                                                                                                                   |
| Ruiz-Roso et al.<br>(2020) [37] | Moderate PA –<br>minutes per week                                                                                     | 60.5                                   | 20.6      | –39.9  | 0.0007  | “The Spanish government released on the 14th of March an executive order to implement a state of alarm, when strict lockdown measures such as social dis-<br>tancing and complete confinement at home were first imposed.”                                        |
|                                 | Male                                                                                                                  | 44.5                                   | 21.2      | –23.3  | 0.0005  |                                                                                                                                                                                                                                                                   |
|                                 | Female                                                                                                                | 190.6                                  | 33.8      | –156.8 | 0.0119  |                                                                                                                                                                                                                                                                   |
|                                 | 44–63 years old                                                                                                       | 68.2                                   | 48.4      | –19.8  | 0.3694  |                                                                                                                                                                                                                                                                   |
|                                 | 64–77 years old                                                                                                       | 81.3                                   | 32.7      | –48.6  | 0.2803  |                                                                                                                                                                                                                                                                   |
|                                 | BMI: 25.0–<30 kg/m <sup>2</sup>                                                                                       | 102.9                                  | 60.9      | –42.0  | 0.0658  |                                                                                                                                                                                                                                                                   |
|                                 | BMI: 30–<35 kg/m <sup>2</sup>                                                                                         | 124.0                                  | 26.3      | –97.7  | 0.0933  |                                                                                                                                                                                                                                                                   |
|                                 | BMI: 35–<40 kg/m <sup>2</sup>                                                                                         | 125.7                                  | 43.6      | –82.1  | 0.0118  |                                                                                                                                                                                                                                                                   |
|                                 | Capillary HbA1c:<br><6,5%                                                                                             | 57.2                                   | 40.3      | –16.9  | 0.5591  |                                                                                                                                                                                                                                                                   |
|                                 | Capillary HbA1c:<br>≥6,5%                                                                                             | 363.2                                  | 108.8     | –254.4 | 0.0006  |                                                                                                                                                                                                                                                                   |
|                                 |                                                                                                                       | 268.4                                  | 128.3     | –140.1 | 0.0005  |                                                                                                                                                                                                                                                                   |
|                                 | Walking – minutes per<br>week                                                                                         | 231.9                                  | 89.7      | –142.2 | 0.0007  |                                                                                                                                                                                                                                                                   |
|                                 | Male                                                                                                                  | 339.9                                  | 124.8     | –215.1 | <0.0001 |                                                                                                                                                                                                                                                                   |
|                                 | Female                                                                                                                | 434.7                                  | 138.0     | –296.7 | 0.0037  |                                                                                                                                                                                                                                                                   |
|                                 | 44–63 years old                                                                                                       | 270.4                                  | 113.3     | –157.1 | 0.0002  |                                                                                                                                                                                                                                                                   |
|                                 | 64–77 years old                                                                                                       | 214.8                                  | 95.9      | –118.9 | 0.0142  |                                                                                                                                                                                                                                                                   |
|                                 | BMI: 25.0–<30 kg/m <sup>2</sup>                                                                                       | 291.3                                  | 127.2     | –164.1 | 0.0003  |                                                                                                                                                                                                                                                                   |
|                                 | BMI: 30–<35 kg/m <sup>2</sup>                                                                                         | 289.5                                  | 85.4      | –204.1 | 0.0004  |                                                                                                                                                                                                                                                                   |
|                                 | BMI: 35–<40 kg/m <sup>2</sup>                                                                                         |                                        |           |        |         |                                                                                                                                                                                                                                                                   |
|                                 | Capillary HbA1c:<br><6,5%                                                                                             | 5.2                                    | 7.7       | +2.5   | <0.0001 |                                                                                                                                                                                                                                                                   |
|                                 |                                                                                                                       | 5.6                                    | 6.8       | +1.2   | 0.0213  |                                                                                                                                                                                                                                                                   |
|                                 | Capillary HbA1c:<br>≥6,5%                                                                                             | 5.9                                    | 7.3       | +1.4   | 0.0332  |                                                                                                                                                                                                                                                                   |
|                                 |                                                                                                                       | 5.2                                    | 7.3       | +2.1   | <0.0001 |                                                                                                                                                                                                                                                                   |
|                                 |                                                                                                                       | 6.0                                    | 7.5       | +1.5   | 0.0516  |                                                                                                                                                                                                                                                                   |
|                                 |                                                                                                                       | 5.2                                    | 6.7       | +1.5   | 0.001   |                                                                                                                                                                                                                                                                   |

|                              |                                              |      |       |       |         |                                                                                                                                                                                                                                                                                                                                                            |
|------------------------------|----------------------------------------------|------|-------|-------|---------|------------------------------------------------------------------------------------------------------------------------------------------------------------------------------------------------------------------------------------------------------------------------------------------------------------------------------------------------------------|
|                              | <i>Sitting – hours per week</i>              | 5.4  | 7.2   | +1.8  | 0.0043  |                                                                                                                                                                                                                                                                                                                                                            |
|                              |                                              | 5.4  | 6.9   | +1.5  | <0.0001 |                                                                                                                                                                                                                                                                                                                                                            |
|                              | Male                                         | 5.0  | 7.2   | +2.2  | 0.0002  |                                                                                                                                                                                                                                                                                                                                                            |
|                              | Female                                       |      |       |       |         |                                                                                                                                                                                                                                                                                                                                                            |
|                              | 44–63 years old                              |      |       |       |         |                                                                                                                                                                                                                                                                                                                                                            |
|                              | 64–77 years old                              |      |       |       |         |                                                                                                                                                                                                                                                                                                                                                            |
|                              | BMI: 25.0–<30 kg/m <sup>2</sup>              |      |       |       |         |                                                                                                                                                                                                                                                                                                                                                            |
|                              | BMI: 30–<35 kg/m <sup>2</sup>                |      |       |       |         |                                                                                                                                                                                                                                                                                                                                                            |
|                              | BMI: 35–<40 kg/m <sup>2</sup>                |      |       |       |         |                                                                                                                                                                                                                                                                                                                                                            |
|                              | Capillary HbA1c: <6,5%                       |      |       |       |         |                                                                                                                                                                                                                                                                                                                                                            |
|                              | Capillary HbA1c: ≥6,5%                       |      |       |       |         |                                                                                                                                                                                                                                                                                                                                                            |
| Sankar et al. (2020) [38]    | <i>Change in PA - % participants</i>         | N.A. | 2.7%  | N.A.  | N.A.    | “In Pathanamthitta district of South Kerala, the lockdown was enforced on March 16, 2020, one week earlier than the nationwide 21-day lockdown 1.0 which was announced on March 24, 2020. This was followed by lockdown 2.0 and 3.0 which ended on May 17, 2020.”                                                                                          |
|                              | Increased                                    |      | 82.7% |       |         |                                                                                                                                                                                                                                                                                                                                                            |
|                              | Same as before                               |      | 14.5% |       |         |                                                                                                                                                                                                                                                                                                                                                            |
|                              | Decreased                                    |      |       |       |         |                                                                                                                                                                                                                                                                                                                                                            |
| Brown et al. (2020) [28]     | <i>Change in exercise - % participants</i>   | N.A. | 41%   | N.A.  | N.A.    | N.A.                                                                                                                                                                                                                                                                                                                                                       |
|                              | Conducted via alternative method(s)          |      | 7,9%  |       |         |                                                                                                                                                                                                                                                                                                                                                            |
|                              | Postponed                                    |      | 21%   |       |         |                                                                                                                                                                                                                                                                                                                                                            |
|                              | Cancelled                                    |      | 30%   |       |         |                                                                                                                                                                                                                                                                                                                                                            |
|                              | Not applicable                               |      |       |       |         |                                                                                                                                                                                                                                                                                                                                                            |
| Schirinzi et al. (2020) [40] | <i>Playing sports - % participants</i>       | 80%  | 81%   | +1%   | N.A.    | N.A.                                                                                                                                                                                                                                                                                                                                                       |
| Shalash et al. (2020) [41]   | <i>PA decline - % participants</i>           | N.A. | 68.4% | N.A.  |         | N.A.                                                                                                                                                                                                                                                                                                                                                       |
|                              | <i>PA decline</i>                            |      |       |       | 0.002   |                                                                                                                                                                                                                                                                                                                                                            |
|                              | <i>PA frequency – times per week</i>         | 5.0  | 5.0   | 0,0   | 0.011   |                                                                                                                                                                                                                                                                                                                                                            |
|                              |                                              | 1.0  | 0.7   | –0.3  | 0.003   |                                                                                                                                                                                                                                                                                                                                                            |
|                              | <i>PA duration – hours per session</i>       | 26.4 | 12.8  | –13,6 | <0.001  | “In Korea, the first COVID-19 was reported on January 21, 2020 and the number of daily new cases increased to 909 on February 29, 2020. The Korean government placed enhanced social distancing (staying at home and refraining from going out as much as possible) from March 22, 2020 to May 19th, 2020, and then changed to routine social distancing.” |
| Song et al. (2020) [42]      | <i>PASE leisure part score</i>               | 7%   | 22%   | +15%  | <0.001  |                                                                                                                                                                                                                                                                                                                                                            |
|                              |                                              | 58%  | 60%   | +2%   | 1.000   |                                                                                                                                                                                                                                                                                                                                                            |
|                              | <i>Patterns of exercise - % participants</i> | 7%   | 12%   | +5%   | 0.315   |                                                                                                                                                                                                                                                                                                                                                            |
|                              |                                              | 23%  | 5%    | –18%  | <0.001  |                                                                                                                                                                                                                                                                                                                                                            |
|                              | None                                         | 5%   | 1%    | –4%   | 0.625   |                                                                                                                                                                                                                                                                                                                                                            |

|                                  |                                                                                                                                                               |                          |                         |                         |                  |                                                                                                                                                                                                                                                                                                                                                                                                                       |
|----------------------------------|---------------------------------------------------------------------------------------------------------------------------------------------------------------|--------------------------|-------------------------|-------------------------|------------------|-----------------------------------------------------------------------------------------------------------------------------------------------------------------------------------------------------------------------------------------------------------------------------------------------------------------------------------------------------------------------------------------------------------------------|
|                                  | Outdoor-solo<br>Indoor-solo<br>Exercise at sports facilities<br>Group exercise                                                                                |                          |                         |                         |                  |                                                                                                                                                                                                                                                                                                                                                                                                                       |
| Van der Heide et al. (2020) [45] | Change in PA - %<br>participants<br>More active<br>Equally active<br>Less active                                                                              | N.A.                     | 20.4%<br>33.0%<br>46.6% | N.A.                    | N.A.             | "The first COVID-19 case in the Netherlands was confirmed on February 27, 2020. March 15–20.: Closure of hospitality, schools, nursing homes. No visitors in hospitals. March 23.: Request to stay at home. Only essential traveling. June 1.: Reopening of hospitality and all schools."                                                                                                                             |
| Chagué et al. (2020) [52]        | Decrease in PA - %<br>participants<br>Total<br>Men<br>Women                                                                                                   | N.A.                     | 41.9%<br>33.3%<br>55.1% | N.A.                    | N.A.             | "Limitations in access to care"                                                                                                                                                                                                                                                                                                                                                                                       |
| Vetrovsky et al. (2020) [54]     | Average daily step count - 3 weeks before lockdown vs. 3 weeks within lockdown                                                                                | N.A.                     | N.A.                    | -1134 (189)<br>= -16.2% | <0.001           | "In the Czech Republic, the first case of COVID-19 was reported on 1 March 2020, and since 16 March, the Czech government approved a nationwide quarantine that prohibited movement in public spaces except under special circumstances, which included travelling to and from work and necessary journeys to procure food and supplies; notably, going outside for a walk in a park or the countryside was allowed." |
| Malanchini et al. (2020) [49]    | Device-derived daily patient activity level - hour per day<br>Reference period<br>Pre lockdown period<br>Lockdown period                                      | 2.18 (1.3)<br>2.14 (1.3) | 1.62 (1.2)              | -26.1% (25.0%)          | <0.0001          | N.A.                                                                                                                                                                                                                                                                                                                                                                                                                  |
| Sassone et al. (2020) [50]       | Time spent in movement based on accelerometry - hours per day<br>Time spent in movement based on accelerometry without very inactive patients - hours per day | 1.6 (0.5)<br>2.0 (0.6)   | 1.2 (0.3)<br>1.5 (0.4)  | -25%<br>-25%            | 0.0001<br>0.0001 | N.A.                                                                                                                                                                                                                                                                                                                                                                                                                  |
| Cransac-Miet et al. (2020) [29]  | Change in PA - % total participants<br>>25% increase<br>No change<br>>25% decrease                                                                            | N.A.                     | 8.2%<br>46.7%<br>45.1%  | N.A.                    | N.A.             | N.A.                                                                                                                                                                                                                                                                                                                                                                                                                  |



|                                      |                                                     |                 |                             |                  |               |      |
|--------------------------------------|-----------------------------------------------------|-----------------|-----------------------------|------------------|---------------|------|
|                                      |                                                     |                 | <i>Change in PA - %</i>     | 25.4%            |               |      |
|                                      |                                                     |                 | <i>non-LTX participants</i> | 45.1%            |               |      |
|                                      |                                                     |                 | More frequently             | 45.1%            |               |      |
|                                      |                                                     |                 | No change                   |                  |               |      |
|                                      |                                                     |                 | Less frequently             |                  |               |      |
| Endstrasser et al.<br>(2020) [51]    | <i>SF-12 Physical Component Summary score</i>       |                 |                             |                  |               |      |
|                                      |                                                     |                 | Pre lockdown                |                  |               | N.A. |
|                                      |                                                     | 37.89 (8.92)    | 37.36 (9.08)                | -0.53            | 0.204         |      |
|                                      |                                                     |                 | 35.48 (9.62)                | -2.41 & -1.88    | 0.026 & 0.071 |      |
| Di Stefano et al.<br>(2020) [30]     | <i>MET total PA - minutes per week</i>              |                 |                             |                  |               |      |
|                                      | Patients with neuro-muscular disease                |                 |                             |                  |               |      |
|                                      | Healthy controls                                    |                 |                             |                  |               |      |
|                                      |                                                     | 901.3 (1299.6)  | 400.6 (1088.5)              | -500.7 (705.7)   | <0.0001       |      |
|                                      |                                                     | 4506.5 (7600.1) | 2362.3 (4498.9)             | -2144.3 (8630.7) | <0.0001       |      |
|                                      | Patients with neuro-muscular disease                |                 |                             |                  |               |      |
|                                      |                                                     | 70.1 (361.9)    | 37.1 (303.9)                | -33 (219.2)      | 0.69          |      |
|                                      |                                                     | 2081.8 (4945.3) | 861.9 (1662.9)              | -1219.9 (4920.8) | 0.04          |      |
|                                      | <i>MET moderate intensity PA - minutes per week</i> |                 |                             |                  |               |      |
|                                      |                                                     | 263.2 (606.9)   | 146.9 (450.6)               | -116.2 (323.2)   | 0.07          | N.A. |
|                                      |                                                     | 1153.3 (2424.6) | 925.4 (3675.6)              | -227.87 (4076.9) | 0.01          |      |
|                                      | Healthy controls                                    |                 |                             |                  |               |      |
|                                      |                                                     | 547.7 (733.2)   | 211.9 (534)                 | -149.3 (426.8)   | <0.0001       |      |
|                                      |                                                     | 1271.5 (2703.6) | 574.9 (1731.3)              | -1447.8 (7611.3) | <0.0001       |      |
| Patients with neuro-muscular disease |                                                     |                 |                             |                  |               |      |
|                                      |                                                     |                 |                             |                  |               |      |
|                                      |                                                     |                 |                             |                  |               |      |
|                                      |                                                     |                 |                             |                  |               |      |
|                                      |                                                     |                 |                             |                  |               |      |
|                                      |                                                     |                 |                             |                  |               |      |
|                                      |                                                     |                 |                             |                  |               |      |
|                                      |                                                     |                 |                             |                  |               |      |
|                                      |                                                     |                 |                             |                  |               |      |
|                                      |                                                     |                 |                             |                  |               |      |
|                                      |                                                     |                 |                             |                  |               |      |
|                                      |                                                     |                 |                             |                  |               |      |
|                                      |                                                     |                 |                             |                  |               |      |
|                                      |                                                     |                 |                             |                  |               |      |
|                                      |                                                     |                 |                             |                  |               |      |
|                                      |                                                     |                 |                             |                  |               |      |
|                                      |                                                     |                 |                             |                  |               |      |
|                                      |                                                     |                 |                             |                  |               |      |
|                                      |                                                     |                 |                             |                  |               |      |
|                                      |                                                     |                 |                             |                  |               |      |
|                                      |                                                     |                 |                             |                  |               |      |
|                                      |                                                     |                 |                             |                  |               |      |
|                                      |                                                     |                 |                             |                  |               |      |
|                                      |                                                     |                 |                             |                  |               |      |
|                                      |                                                     |                 |                             |                  |               |      |
|                                      |                                                     |                 |                             |                  |               |      |
|                                      |                                                     |                 |                             |                  |               |      |
|                                      |                                                     |                 |                             |                  |               |      |
|                                      |                                                     |                 |                             |                  |               |      |
|                                      |                                                     |                 |                             |                  |               |      |
|                                      |                                                     |                 |                             |                  |               |      |
|                                      |                                                     |                 |                             |                  |               |      |
|                                      |                                                     |                 |                             |                  |               |      |
|                                      |                                                     |                 |                             |                  |               |      |
|                                      |                                                     |                 |                             |                  |               |      |
|                                      |                                                     |                 |                             |                  |               |      |
|                                      |                                                     |                 |                             |                  |               |      |
|                                      |                                                     |                 |                             |                  |               |      |
|                                      |                                                     |                 |                             |                  |               |      |
|                                      |                                                     |                 |                             |                  |               |      |
|                                      |                                                     |                 |                             |                  |               |      |
|                                      |                                                     |                 |                             |                  |               |      |
|                                      |                                                     |                 |                             |                  |               |      |
|                                      |                                                     |                 |                             |                  |               |      |
|                                      |                                                     |                 |                             |                  |               |      |
|                                      |                                                     |                 |                             |                  |               |      |
|                                      |                                                     |                 |                             |                  |               |      |
|                                      |                                                     |                 |                             |                  |               |      |
|                                      |                                                     |                 |                             |                  |               |      |
|                                      |                                                     |                 |                             |                  |               |      |
|                                      |                                                     |                 |                             |                  |               |      |
|                                      |                                                     |                 |                             |                  |               |      |
|                                      |                                                     |                 |                             |                  |               |      |
|                                      |                                                     |                 |                             |                  |               |      |
|                                      |                                                     |                 |                             |                  |               |      |
|                                      |                                                     |                 |                             |                  |               |      |
|                                      |                                                     |                 |                             |                  |               |      |
|                                      |                                                     |                 |                             |                  |               |      |
|                                      |                                                     |                 |                             |                  |               |      |
|                                      |                                                     |                 |                             |                  |               |      |
|                                      |                                                     |                 |                             |                  |               |      |
|                                      |                                                     |                 |                             |                  |               |      |
|                                      |                                                     |                 |                             |                  |               |      |
|                                      |                                                     |                 |                             |                  |               |      |
|                                      |                                                     |                 |                             |                  |               |      |
|                                      |                                                     |                 |                             |                  |               |      |
|                                      |                                                     |                 |                             |                  |               |      |
|                                      |                                                     |                 |                             |                  |               |      |
|                                      |                                                     |                 |                             |                  |               |      |
|                                      |                                                     |                 |                             |                  |               |      |
|                                      |                                                     |                 |                             |                  |               |      |
|                                      |                                                     |                 |                             |                  |               |      |
|                                      |                                                     |                 |                             |                  |               |      |
|                                      |                                                     |                 |                             |                  |               |      |
|                                      |                                                     |                 |                             |                  |               |      |
|                                      |                                                     |                 |                             |                  |               |      |
|                                      |                                                     |                 |                             |                  |               |      |
|                                      |                                                     |                 |                             |                  |               |      |
|                                      |                                                     |                 |                             |                  |               |      |
|                                      |                                                     |                 |                             |                  |               |      |
|                                      |                                                     |                 |                             |                  |               |      |
|                                      |                                                     |                 |                             |                  |               |      |
|                                      |                                                     |                 |                             |                  |               |      |
|                                      |                                                     |                 |                             |                  |               |      |
|                                      |                                                     |                 |                             |                  |               |      |
|                                      |                                                     |                 |                             |                  |               |      |
|                                      |                                                     |                 |                             |                  |               |      |
|                                      |                                                     |                 |                             |                  |               |      |
|                                      |                                                     |                 |                             |                  |               |      |
|                                      |                                                     |                 |                             |                  |               |      |
|                                      |                                                     |                 |                             |                  |               |      |
|                                      |                                                     |                 |                             |                  |               |      |
|                                      |                                                     |                 |                             |                  |               |      |
|                                      |                                                     |                 |                             |                  |               |      |
|                                      |                                                     |                 |                             |                  |               |      |
|                                      |                                                     |                 |                             |                  |               |      |
|                                      |                                                     |                 |                             |                  |               |      |
|                                      |                                                     |                 |                             |                  |               |      |
|                                      |                                                     |                 |                             |                  |               |      |
|                                      |                                                     |                 |                             |                  |               |      |
|                                      |                                                     |                 |                             |                  |               |      |
|                                      |                                                     |                 |                             |                  |               |      |
|                                      |                                                     |                 |                             |                  |               |      |
|                                      |                                                     |                 |                             |                  |               |      |
|                                      |                                                     |                 |                             |                  |               |      |
|                                      |                                                     |                 |                             |                  |               |      |
|                                      |                                                     |                 |                             |                  |               |      |
|                                      |                                                     |                 |                             |                  |               |      |
|                                      |                                                     |                 |                             |                  |               |      |
|                                      |                                                     |                 |                             |                  |               |      |
|                                      |                                                     |                 |                             |                  |               |      |
|                                      |                                                     |                 |                             |                  |               |      |
|                                      |                                                     |                 |                             |                  |               |      |
|                                      |                                                     |                 |                             |                  |               |      |
|                                      |                                                     |                 |                             |                  |               |      |
|                                      |                                                     |                 |                             |                  |               |      |
|                                      |                                                     |                 |                             |                  |               |      |
|                                      |                                                     |                 |                             |                  |               |      |
|                                      |                                                     |                 |                             |                  |               |      |
|                                      |                                                     |                 |                             |                  |               |      |
|                                      |                                                     |                 |                             |                  |               |      |
|                                      |                                                     |                 |                             |                  |               |      |
|                                      |                                                     |                 |                             |                  |               |      |
|                                      |                                                     |                 |                             |                  |               |      |
|                                      |                                                     |                 |                             |                  |               |      |
|                                      |                                                     |                 |                             |                  |               |      |
|                                      |                                                     |                 |                             |                  |               |      |
|                                      |                                                     |                 |                             |                  |               |      |
|                                      |                                                     |                 |                             |                  |               |      |
|                                      |                                                     |                 |                             |                  |               |      |
|                                      |                                                     |                 |                             |                  |               |      |
|                                      |                                                     |                 |                             |                  |               |      |
|                                      |                                                     |                 |                             |                  |               |      |
|                                      |                                                     |                 |                             |                  |               |      |
|                                      |                                                     |                 |                             |                  |               |      |
|                                      |                                                     |                 |                             |                  |               |      |
|                                      |                                                     |                 |                             |                  |               |      |
|                                      |                                                     |                 |                             |                  |               |      |
|                                      |                                                     |                 |                             |                  |               |      |
|                                      |                                                     |                 |                             |                  |               |      |
|                                      |                                                     |                 |                             |                  |               |      |
|                                      |                                                     |                 |                             |                  |               |      |
|                                      |                                                     |                 |                             |                  |               |      |
|                                      |                                                     |                 |                             |                  |               |      |
|                                      |                                                     |                 |                             |                  |               |      |
|                                      |                                                     |                 |                             |                  |               |      |
|                                      |                                                     |                 |                             |                  |               |      |
|                                      |                                                     |                 |                             |                  |               |      |
|                                      |                                                     |                 |                             |                  |               |      |
|                                      |                                                     |                 |                             |                  |               |      |
|                                      |                                                     |                 |                             |                  |               |      |
|                                      |                                                     |                 |                             |                  |               |      |
|                                      |                                                     |                 |                             |                  |               |      |
|                                      |                                                     |                 |                             |                  |               |      |
|                                      |                                                     |                 |                             |                  |               |      |
|                                      |                                                     |                 |                             |                  |               |      |
|                                      |                                                     |                 |                             |                  |               |      |
|                                      |                                                     |                 |                             |                  |               |      |
|                                      |                                                     |                 |                             |                  |               |      |
|                                      |                                                     |                 |                             |                  |               |      |
|                                      |                                                     |                 |                             |                  |               |      |
|                                      |                                                     |                 |                             |                  |               |      |
|                                      |                                                     |                 |                             |                  |               |      |
|                                      |                                                     |                 |                             |                  |               |      |
|                                      |                                                     |                 |                             |                  |               |      |
|                                      |                                                     |                 |                             |                  |               |      |
|                                      |                                                     |                 |                             |                  |               |      |
|                                      |                                                     |                 |                             |                  |               |      |
|                                      |                                                     |                 |                             |                  |               |      |
|                                      |                                                     |                 |                             |                  |               |      |
|                                      |                                                     |                 |                             |                  |               |      |
|                                      |                                                     |                 |                             |                  |               |      |
|                                      |                                                     |                 |                             |                  |               |      |
|                                      |                                                     |                 |                             |                  |               |      |
|                                      |                                                     |                 |                             |                  |               |      |
|                                      |                                                     |                 |                             |                  |               |      |
|                                      |                                                     |                 |                             |                  |               |      |
|                                      |                                                     |                 |                             |                  |               |      |
|                                      |                                                     |                 |                             |                  |               |      |
|                                      |                                                     |                 |                             |                  |               |      |
|                                      |                                                     |                 |                             |                  |               |      |
|                                      |                                                     |                 |                             |                  |               |      |
|                                      |                                                     |                 |                             |                  |               |      |
|                                      |                                                     |                 |                             |                  |               |      |
|                                      |                                                     |                 |                             |                  |               |      |
|                                      |                                                     |                 |                             |                  |               |      |
|                                      |                                                     |                 |                             |                  |               |      |
|                                      |                                                     |                 |                             |                  |               |      |
|                                      |                                                     |                 |                             |                  |               |      |
|                                      |                                                     |                 |                             |                  |               |      |
|                                      |                                                     |                 |                             |                  |               |      |
|                                      |                                                     |                 |                             |                  |               |      |
|                                      |                                                     |                 |                             |                  |               |      |
|                                      |                                                     |                 |                             |                  |               |      |
|                                      |                                                     |                 |                             |                  |               |      |
|                                      |                                                     |                 |                             |                  |               |      |
|                                      |                                                     |                 |                             |                  |               |      |
|                                      |                                                     |                 |                             |                  |               |      |
|                                      |                                                     |                 |                             |                  |               |      |
|                                      |                                                     |                 |                             |                  |               |      |
|                                      |                                                     |                 |                             |                  |               |      |



|                                    |                                                  |      |       |      |      |                                       |
|------------------------------------|--------------------------------------------------|------|-------|------|------|---------------------------------------|
| Van de Venis et al.<br>(2020) [44] | <i>Change in PA - %<br/>participants</i>         |      |       |      |      |                                       |
|                                    | Strong increase                                  |      | 0%    |      |      |                                       |
|                                    | Mild increase                                    | N.A. | 7%    | N.A. | N.A. | “Partial lockdown in the Netherlands” |
|                                    | No change                                        |      | 19%   |      |      |                                       |
|                                    | Mild decrease                                    |      | 41%   |      |      |                                       |
|                                    | Strong increase                                  |      | 33%   |      |      |                                       |
| Al-Hashel et al.<br>(2020) [26]    | <i>Lack of regular exercise - % participants</i> | N.A. | 79.7% | N.A. | N.A. | N.A.                                  |

Note: physical activity, PA.
